# Supplementary material for: Synthesis of free-standing ternary Rh–Pt–SnO2-carbon nanotube nanostructures as a highly active and robust catalyst for ethanol oxidation
Source: Royal Society of Chemistry journal article supplement (doi:10.1039/d0ra10030g), 2020-01-01
Supplement: d0ra10030g1.pdf [file d0ra10030g1.pdf]

## Synthesis of free-standing ternary Rh-Pt-SnO<sub>2</sub>-carbon nanotubes nanostructures as highly active and robust catalyst for ethanol oxidation

Haixia Wang, Shuhui Sun and Mohamed Mohamedi \*

Énergie, Matériaux et Télécommunications (EMT), Institut National de la Recherche Scientifique (INRS), 1650 Boulevard Lionel Boulet, Varennes, Quebec, J3X 1S2, Canada  
Email: mohamedi@emt.inrs.ca

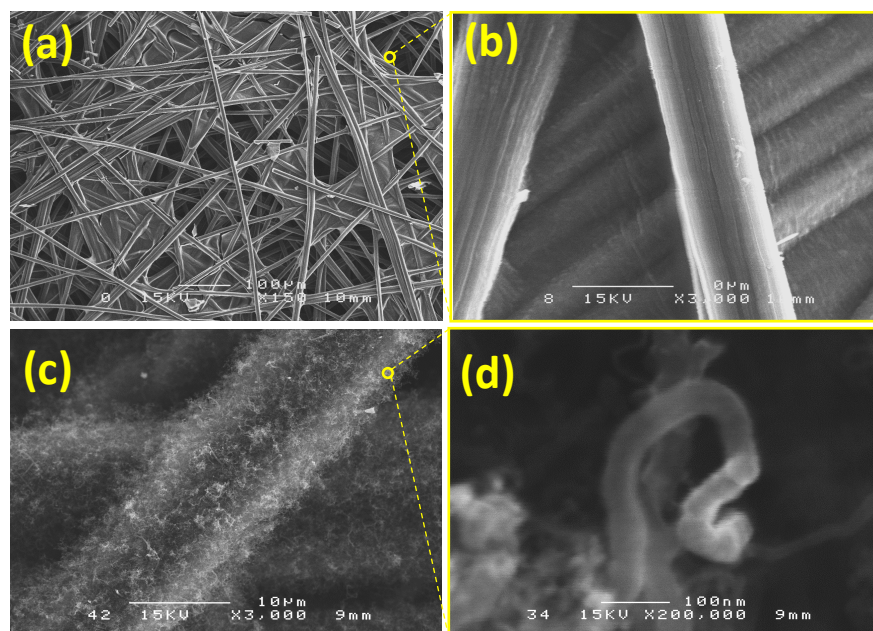

**Figure S1** SEM images of carbon paper substrate (a-b) and as synthesized CNTs (c-d).

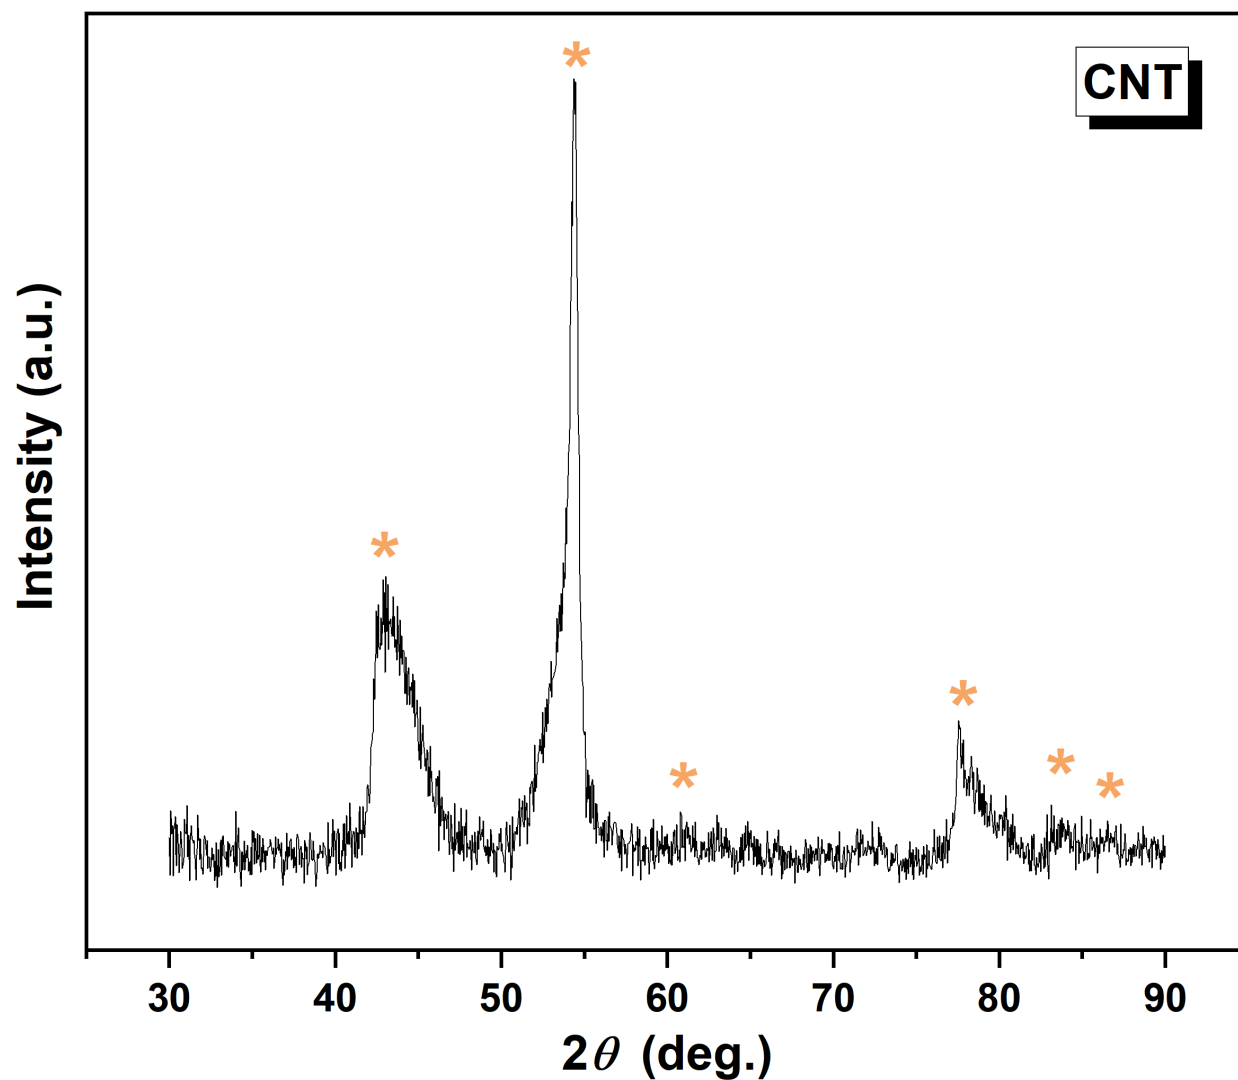

Figure S2 XRD of pristine CNTs as synthesized by CVD method.

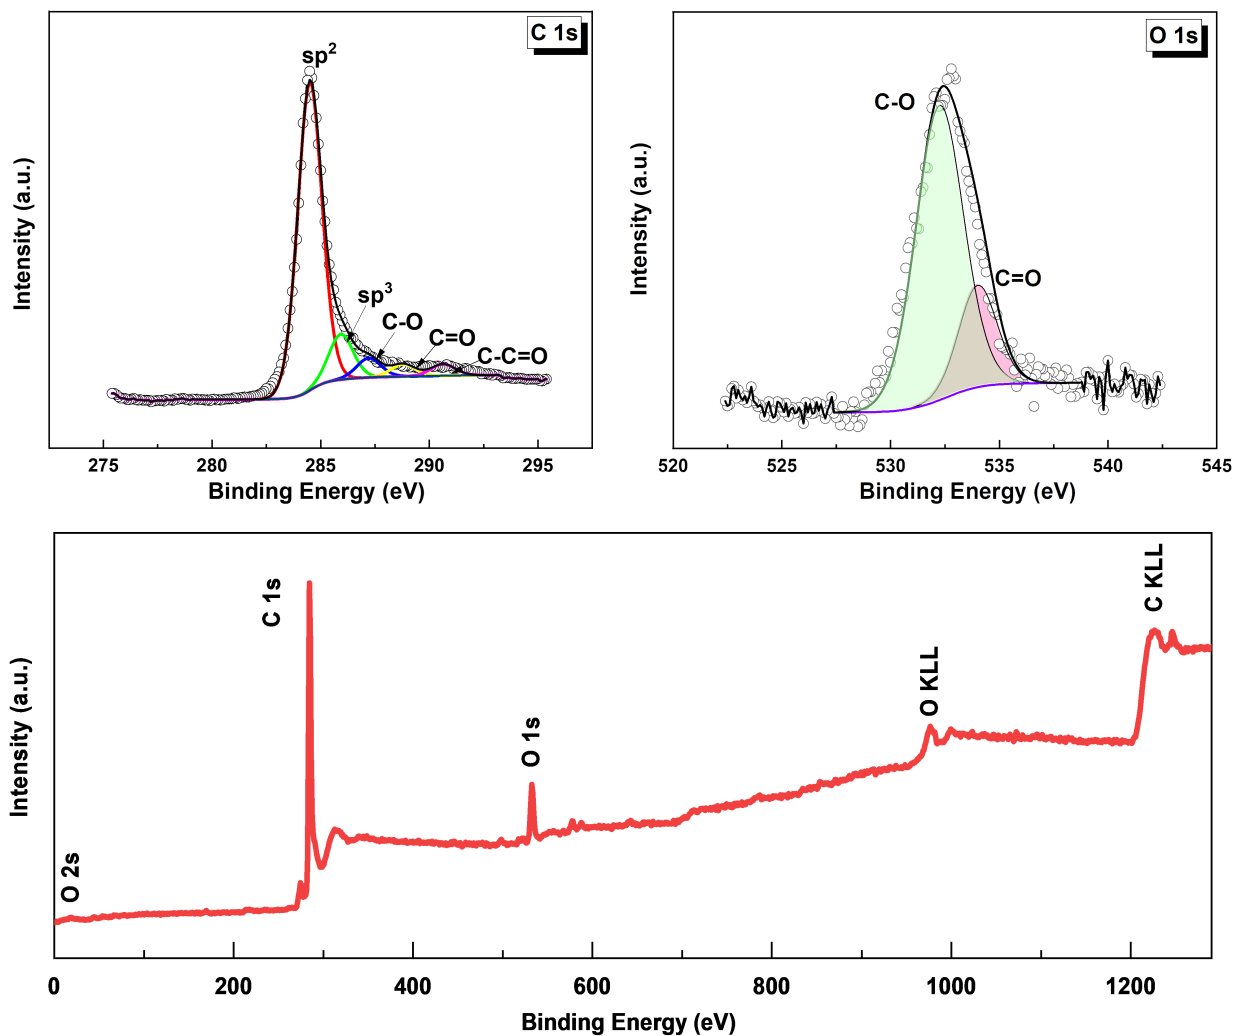

**Figure S3** XPS survey scan and high-resolution XPS of C 1s and O 1s core-levels of the CNTs.

**Table S1** XRD parameters

| Catalysts                                 | $2\theta$ (deg.) | $d_{111}$ (Å) | $a$ (Å) | $CS$ (Å) |
|-------------------------------------------|------------------|---------------|---------|----------|
| Pt/CNT                                    | 39.78            | 2.264         | 3.922   | 70.63    |
| Pt/SnO <sub>2</sub> /CNT                  | 39.76            | 2.265         | 3.923   | 61.25    |
| Rh <sub>5</sub> /Pt/CNT                   | 39.74            | 2.266         | 3.926   | 57.60    |
| Rh <sub>5</sub> /Pt/SnO <sub>2</sub> /CNT | 39.72            | 2.267         | 3.927   | 54.73    |

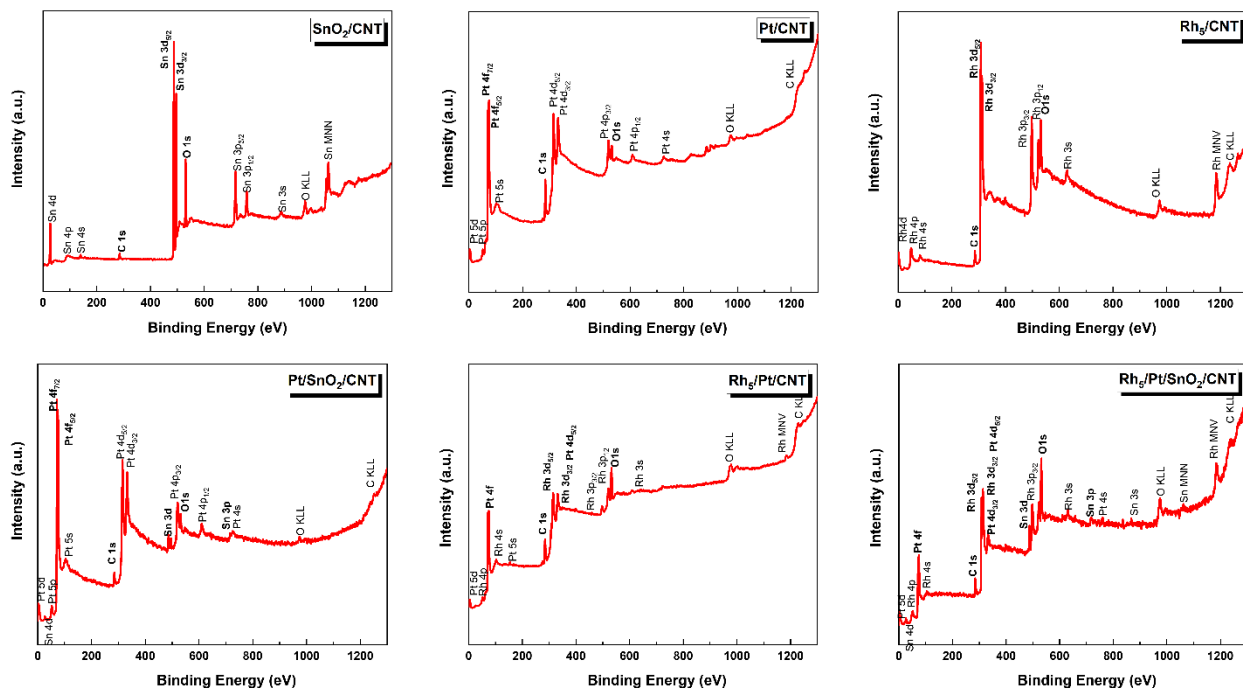

Figure S4 XPS survey scans of the catalysts grown by PLD onto CNTs substrate.

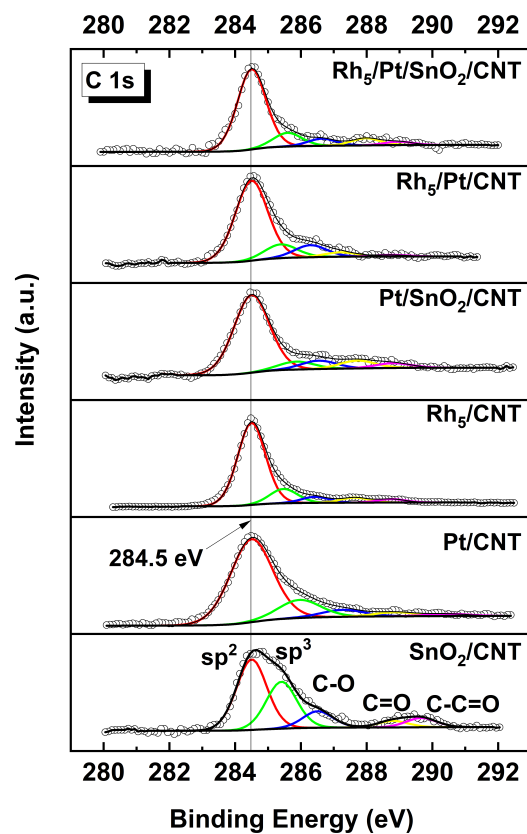

Figure S5 High-resolution XPS of C 1s core-level.

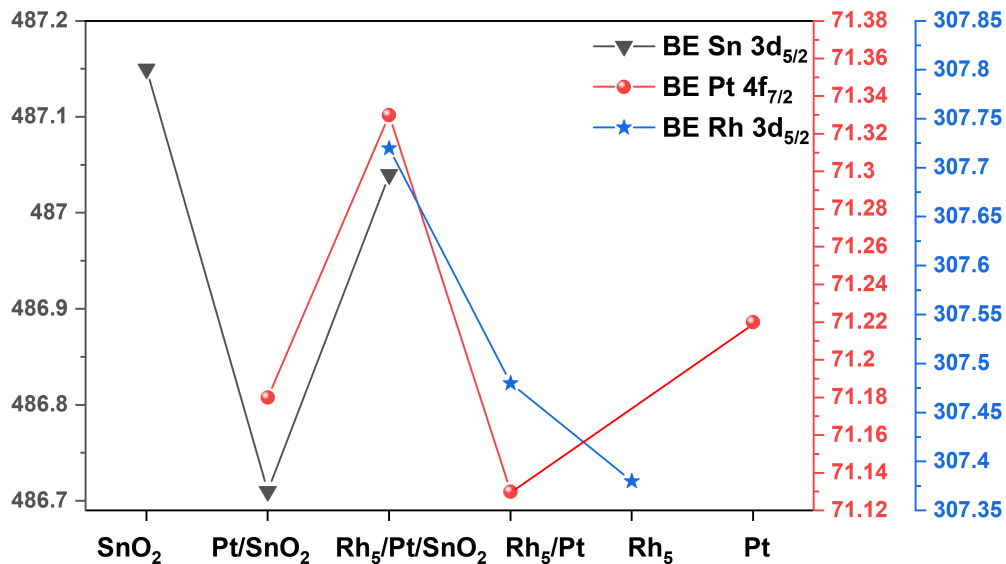

**Figure S6** Binding energies of Sn 3d<sub>5/2</sub>, Pt 4f<sub>7/2</sub> and Rh 3d<sub>5/2</sub>.

**Table S2** Atomic surface composition estimated by XPS.

|                                           | C (%) | O (%) | SnO <sub>2</sub> (%) | Pt (%) | Rh (%) | Rh <sub>2</sub> O <sub>3</sub> (%) | Rh 3p <sub>3/2</sub> (%) |
|-------------------------------------------|-------|-------|----------------------|--------|--------|------------------------------------|--------------------------|
| Pt/CNT                                    | 62.35 | 8.75  | -                    | 28.9   | -      | -                                  | -                        |
| SnO <sub>2</sub> /CNT                     | 15.33 | 56.14 | 28.52                | -      | -      | -                                  | -                        |
| Rh <sub>5</sub> /CNT                      | 46.84 | 25.42 | -                    | -      | 21.47  | 5.44                               | -                        |
| Pt/SnO <sub>2</sub> /CNT                  | 44.15 | 21.59 | 4.47                 | 29.79  | -      | -                                  | -                        |
| Rh <sub>5</sub> /Pt/CNT                   | 51.26 | 21.36 | -                    | 12.73  | 10.71  | 3.94                               | -                        |
| Rh <sub>5</sub> /Pt/SnO <sub>2</sub> /CNT | 25.51 | 30.32 | 2.07                 | 14.1   | 9.4    | 2.98                               | 10.6                     |

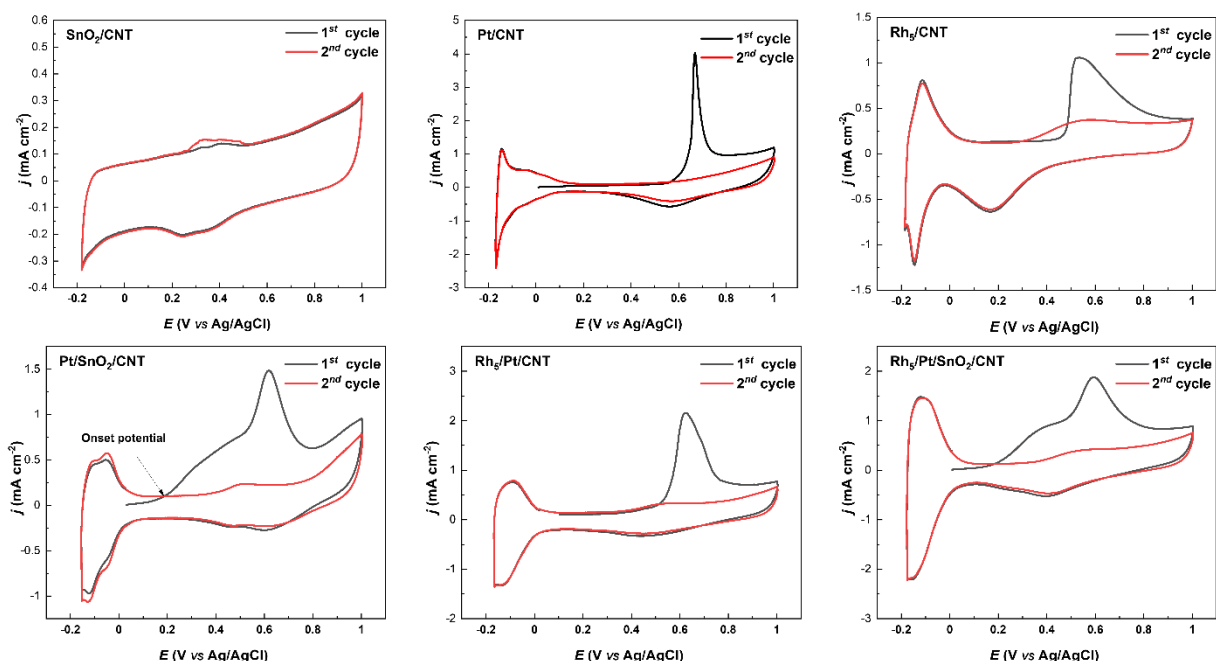

**Figure S7** CO-stripping voltammetry in the base electrolyte 0.5 M H<sub>2</sub>SO<sub>4</sub> recorded at 50 mV s<sup>-1</sup>.

**Table S3** Comparative electroactivity of electrocatalysts in 0.5 M H<sub>2</sub>SO<sub>4</sub> solution.

| Substrate<br>Catalyst                | CP                        |                                          |      | CNTs                      |                                          |       |
|--------------------------------------|---------------------------|------------------------------------------|------|---------------------------|------------------------------------------|-------|
|                                      | ESA<br>(cm <sup>2</sup> ) | ASA<br>(m <sup>2</sup> g <sup>-1</sup> ) | RF   | ESA<br>(cm <sup>2</sup> ) | ASA<br>(m <sup>2</sup> g <sup>-1</sup> ) | RF    |
| Pt                                   | 0.90                      | 2.43                                     | 3.8  | 3.01                      | 8.16                                     | 9.79  |
| Pt/SnO <sub>2</sub>                  | 2.38                      | 6.44                                     | 7.7  | 3.82                      | 10.33                                    | 12.40 |
| Rh <sub>5</sub> /Pt                  | 0.90                      | 2.44                                     | 2.9  | 3.56                      | 9.63                                     | 11.55 |
| Rh <sub>5</sub> /Pt/SnO <sub>2</sub> | 5.77                      | 15.63                                    | 18.7 | 7.62                      | 20.64                                    | 24.76 |

**Table S4** Comparative electrochemical EOR activity in 1 M C<sub>2</sub>H<sub>5</sub>OH + 0.5 M H<sub>2</sub>SO<sub>4</sub> solution.

| Substrate<br>Catalyst                | CP                               |                                                 |                                                   | CNTs                             |                                                 |                                                   |
|--------------------------------------|----------------------------------|-------------------------------------------------|---------------------------------------------------|----------------------------------|-------------------------------------------------|---------------------------------------------------|
|                                      | <i>E</i> <sub>onset</sub><br>(V) | <i>j</i> <sub>p</sub><br>(mA cm <sup>-2</sup> ) | <i>MA</i><br>(mA mg <sup>-1</sup> <sub>Pt</sub> ) | <i>E</i> <sub>onset</sub><br>(V) | <i>j</i> <sub>p</sub><br>(mA cm <sup>-2</sup> ) | <i>MA</i><br>(mA mg <sup>-1</sup> <sub>Pt</sub> ) |
| Pt                                   | 0.232                            | 9.55                                            | 79.54                                             | 0.23                             | 18.87                                           | 157.25                                            |
| Pt/SnO <sub>2</sub>                  | 0.168                            | 19.06                                           | 158.8                                             | 0.16                             | 23.16                                           | 193.00                                            |
| Rh <sub>5</sub> /Pt                  | 0.272                            | 11.8                                            | 98.08                                             | 0.26                             | 21.34                                           | 177.83                                            |
| Rh <sub>5</sub> /Pt/SnO <sub>2</sub> | 0.167                            | 21.53                                           | 179.4                                             | 0.16                             | 27.77                                           | 213.42                                            |

**Table S5** Comparative durability EOR activity in 1 M C<sub>2</sub>H<sub>5</sub>OH + 0.5 M H<sub>2</sub>SO<sub>4</sub> solution.

| Substrate<br>Catalyst | CP                                                |                                                  |                                                   | CNTs                                              |                                                  |                                                   |
|-----------------------|---------------------------------------------------|--------------------------------------------------|---------------------------------------------------|---------------------------------------------------|--------------------------------------------------|---------------------------------------------------|
|                       | <i>j</i> <sub>t=0</sub><br>(mA cm <sup>-2</sup> ) | <i>j</i> <sub>ss</sub><br>(mA cm <sup>-2</sup> ) | <i>MA</i><br>(mA mg <sup>-1</sup> <sub>Pt</sub> ) | <i>j</i> <sub>t=0</sub><br>(mA cm <sup>-2</sup> ) | <i>j</i> <sub>ss</sub><br>(mA cm <sup>-2</sup> ) | <i>MA</i><br>(mA mg <sup>-1</sup> <sub>Pt</sub> ) |
| Pt                    | 13.6                                              | 1.66                                             | 13.83                                             | 23.60                                             | 7.12                                             | 59.33                                             |
| Pt/SnO <sub>2</sub>   | 22.27                                             | 6.07                                             | 50.58                                             | 30.60                                             | 12.73                                            | 106.08                                            |

|                                      |       |      |       |       |       |        |
|--------------------------------------|-------|------|-------|-------|-------|--------|
| Rh <sub>5</sub> /Pt                  | 10.83 | 4.94 | 41.16 | 28.20 | 11.59 | 96.58  |
| Rh <sub>5</sub> /Pt/SnO <sub>2</sub> | 28.08 | 7.00 | 58.33 | 32.90 | 15.86 | 132.17 |

**Table S6** Comparative Electrochemical CO oxidation activity

| Substrate                            | <i>CP</i>                  |                                       |                                                                    | <i>CNTs</i>                |                                       |                                                                    |
|--------------------------------------|----------------------------|---------------------------------------|--------------------------------------------------------------------|----------------------------|---------------------------------------|--------------------------------------------------------------------|
| Catalyst                             | $E_{onset-CO_{ox}}$<br>(V) | $ESA_{CO_{ox}}$<br>(cm <sup>2</sup> ) | $ASA_{CO_{ox}}$<br>(m <sup>2</sup> g <sup>-1</sup> <sub>Pt</sub> ) | $E_{onset-CO_{ox}}$<br>(V) | $ESA_{CO_{ox}}$<br>(cm <sup>2</sup> ) | $ASA_{CO_{ox}}$<br>(m <sup>2</sup> g <sup>-1</sup> <sub>Pt</sub> ) |
| Pt                                   | 0.60                       | 5.66                                  | 15.31                                                              | 0.57                       | 4.04                                  | 10.92                                                              |
| Pt/SnO <sub>2</sub>                  | 0.14                       | 5.30                                  | 14.30                                                              | 0.19                       | 5.06                                  | 13.70                                                              |
| Rh <sub>5</sub> /Pt                  | 0.53                       | 6.23                                  | 17.00                                                              | 0.52                       | 4.39                                  | 15.76                                                              |
| Rh <sub>5</sub> /Pt/SnO <sub>2</sub> | 0.17                       | 10.84                                 | 29.32                                                              | 0.17                       | 6.91                                  | 18.71                                                              |
